# Supplementary material for: Gene silencing of Sugar-dependent 1 (JcSDP1), encoding a patatin-domain triacylglycerol lipase, enhances seed oil accumulation in Jatropha curcas
Source: PubMed Central journal article supplement (PMC4016141; doi:10.1186/1754-6834-7-36), 2014-03-08

# Figure S1

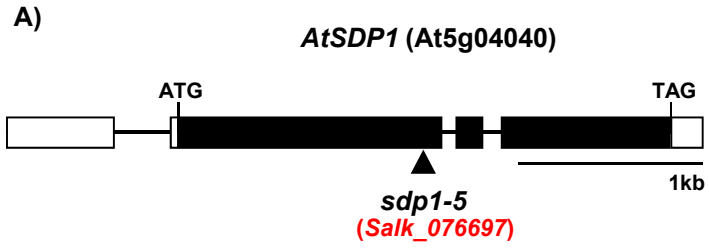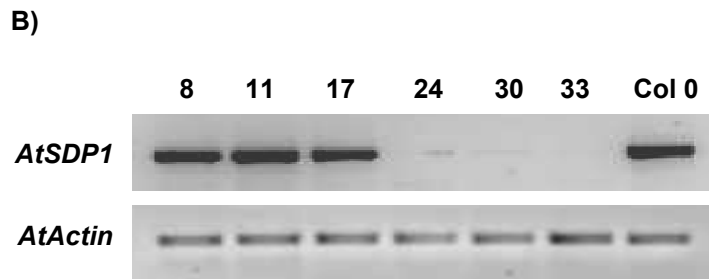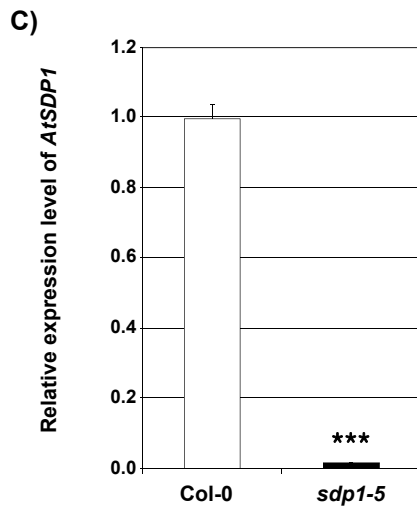

Supplement: 1754-6834-7-36-S1.pdf [file 1754-6834-7-36-S1.pdf]
