# Supplementary material for: Gene silencing of Sugar-dependent 1 (JcSDP1), encoding a patatin-domain triacylglycerol lipase, enhances seed oil accumulation in Jatropha curcas
Source: PubMed Central journal article supplement (PMC4016141; doi:10.1186/1754-6834-7-36), 2014-03-08
Supplement: 1754-6834-7-36-S2.pdf [file 1754-6834-7-36-S2.pdf]

# Table S1

## Seed weight and size of WT (Col-0) and *sdp1-5*

| Name          | Weight of seed ( $\mu\text{g}/\text{seed}$ ) <sup>a</sup> |                | Length of seed ( $\mu\text{m}/\text{seed}$ ) <sup>b</sup> |                | Width of seed ( $\mu\text{m}/\text{seed}$ ) <sup>b</sup> |               |
|---------------|-----------------------------------------------------------|----------------|-----------------------------------------------------------|----------------|----------------------------------------------------------|---------------|
| Col-0         | 19.00                                                     | $\pm 1.10$     | 481.12                                                    | $\pm 3.36$     | 276.70                                                   | $\pm 10.58$   |
| <i>sdp1-5</i> | 21.00                                                     | $\pm 0.57$ **c | 522.86                                                    | $\pm 7.56$ *** | 294.29                                                   | $\pm 15.12$ * |

<sup>a</sup>Seed weight determination using 100 mature seeds. Average values are given with SD (n=5).

<sup>b</sup>The length and width of seed were measured using mature dried seeds. Average values are given with SD (n=10).

<sup>c</sup>\* $P < 0.05$ , \*\* $P < 0.01$  or \*\*\* $P < 0.001$  versus WT (Col -0) seed.
