# Supplementary material for: Gene silencing of Sugar-dependent 1 (JcSDP1), encoding a patatin-domain triacylglycerol lipase, enhances seed oil accumulation in Jatropha curcas
Source: PubMed Central journal article supplement (PMC4016141; doi:10.1186/1754-6834-7-36), 2014-03-08

Figure S3

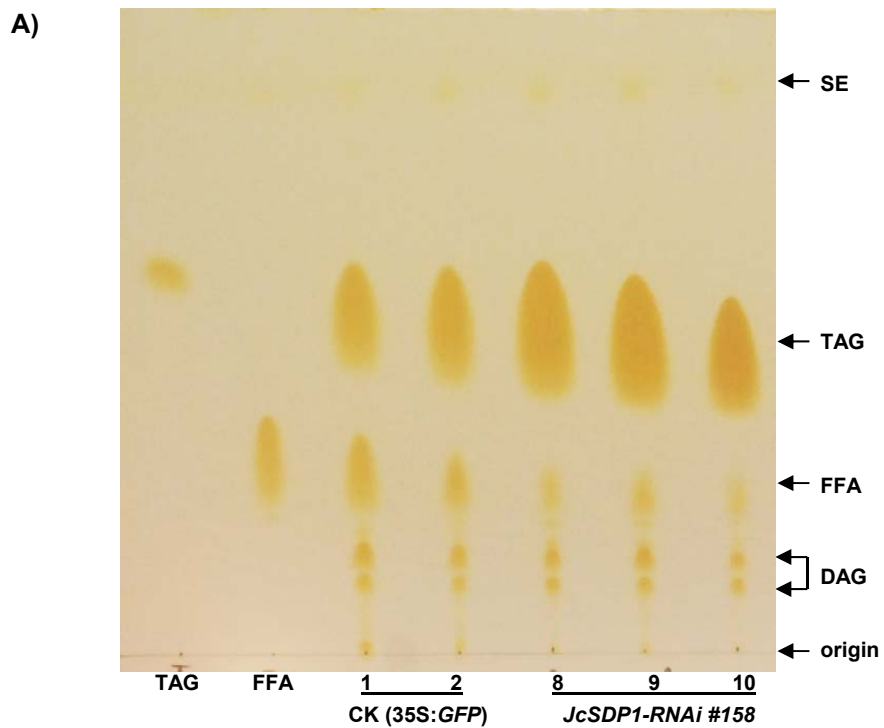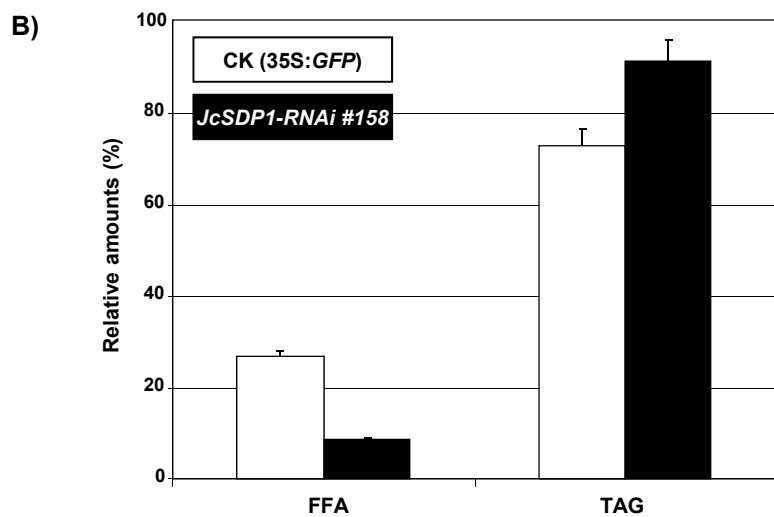

**Figure S3**

**C)**

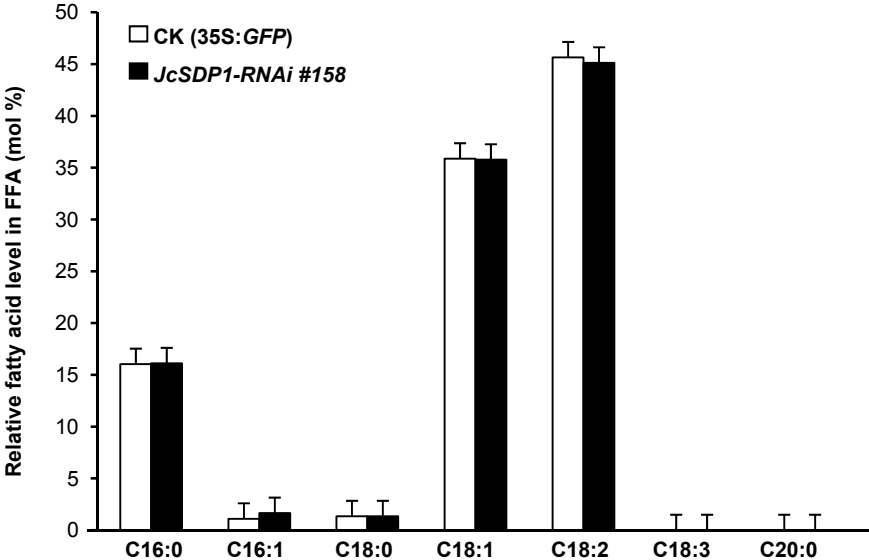

**D)**

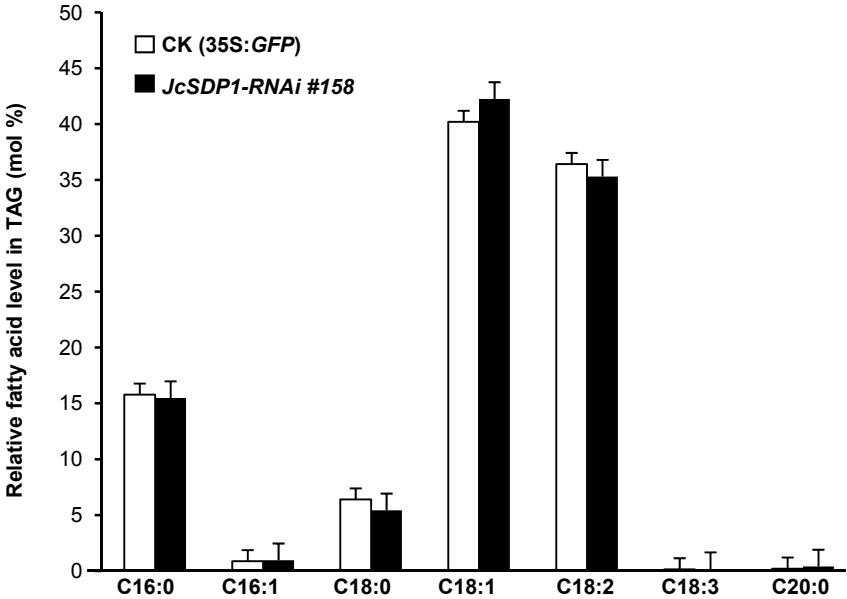

Supplement: 1754-6834-7-36-S5.pdf [file 1754-6834-7-36-S5.pdf]
